# $\beta$ -actin plasticity is modulated by coordinated actions of histidine 73 methylation, nucleotide type, and ions

Adrien Schahl<sup>1,2</sup>, Louis Lagardere<sup>2</sup>, Brandon Walker<sup>3</sup>, Pengyu Ren<sup>3</sup>, Antoine Jégou<sup>4</sup>, Matthieu Chavent<sup>1\*</sup>, Jean-Philip Piquemal<sup>2\*</sup>

\*For correspondence:  
[matthieu.chavent@ipbs.fr](mailto:matthieu.chavent@ipbs.fr),  
[jean-philip.piquemal@sorbonne-universite.fr](mailto:jean-philip.piquemal@sorbonne-universite.fr) ( )

<sup>1</sup>Institut de Pharmacologie et de Biologie Structurale, Université de Toulouse, CNRS, Université Paul Sabatier, 31400 Toulouse, France; <sup>2</sup>Sorbonne Université, LCT, UMR 7616 CNRS, F-75005, Paris, France; <sup>3</sup>Department of Biomedical Engineering, The University of Texas at Austin, Austin, Texas 78712, United States; <sup>4</sup>Université Paris Cité, CNRS, Institut Jacques Monod, F-75013 Paris, France

**Abstract** Actin undergoes important structural changes to transition from the G-actin to the F-actin form. Furthermore, mammals express different isoforms, with only slight variations at the amino acid level. While the  $\alpha$ -skeletal actin isoform was thoroughly studied using molecular dynamics simulations, the dynamics of the  $\beta$ -actin isoform remains unexplored. Here, we have used the AMOEBA polarizable force field coupled with adaptive sampling to investigate the plasticity of the  $\beta$ -actin. This highlighted the role of a post translational modification, i.e. the histidine 73 methylation, to enhance the opening of the actin cleft and change allosteric paths linking the two distant subdomains SD2 and SD4. The action of the methylation can be also modulated by the type of nucleotide bound in the actin cavity and the type of ions surrounding the protein. Taken together, these results shed new lights onto the plasticity of the  $\beta$ -actin isoform and the coordinated role of several environmental factors. These results may help designing new types of molecules, such as allosteric modulators, specifically targeting the  $\beta$ -actin isoform.

## Introduction

Actin is involved in numerous cellular functions, such as cell shape, proliferation, and migration (Svitkina, 2018). Different isoforms are expressed in function of the cell type (Perrin and Ervasti, 2010). Among them  $\alpha$ -actin, one of the most studied isoforms, is only present in muscles while  $\beta$ -actin is ubiquitously expressed in the cytoplasm of cells and exhibits specific functions.

These isoforms share a common structure constituted by four subdomains undergoing conformational changes with large consequences at the molecular up to the supramolecular level (Merino et al., 2020). Above a critical concentration, several monomers assemble to form a filament (Wegner, 1982). In this configuration, the globular actin monomer (G-actin) adopts a flattened structure (F-actin), characterized by a lower dihedral angle constituted by the four subdomains (Oda et al., 2009). The actin structural plasticity is also important at the molecular level as, in the F-actin form, its ATPase activity is increased by four orders of magnitude in comparison of its G-actin form (Blanchoin and Pollard, 2002).

**Table 1.** Parameters of studied systems : isoform, post-translational modification of histidine 73 (HIS: unmodified and HIC: methylated), nucleotide type, ion types, Number of proteins, and initial structure.

| Sequence        | P.T.M. | Nucleotide | Ion (mM)                   | Number  | Structure |
|-----------------|--------|------------|----------------------------|---------|-----------|
| $\alpha$        | HIS    | ATP        | 150 <i>KCl</i>             | Monomer | G         |
| $\alpha$        | HIC    | ATP        | 150 <i>KCl</i>             | Monomer | G         |
| $\beta$         | HIS    | ATP        | 150 <i>KCl</i>             | Monomer | G         |
| $\beta$         | HIC    | ATP        | 150 <i>KCl</i>             | Monomer | G         |
| $\beta$         | HIC    | ATP        | 75 <i>MgCl<sub>2</sub></i> | Monomer | G         |
| $\beta$         | HIS    | ADP        | 150 <i>KCl</i>             | Monomer | G         |
| $\beta$         | HIC    | ADP        | 150 <i>KCl</i>             | Monomer | G         |
| $\beta$         | HIC    | ADP        | 75 <i>MgCl<sub>2</sub></i> | Monomer | G         |
| $\beta_{K118N}$ | HIC    | ATP        | 150 <i>KCl</i>             | Monomer | G         |
| $\beta_{K118N}$ | HIC    | ADP        | 150 <i>KCl</i>             | Monomer | G         |
| $\beta$         | HIC    | ATP        | 150 <i>KCl</i>             | 4-mer   | F         |
| $\beta$         | HIC    | ADP        | 150 <i>KCl</i>             | 4-mer   | F         |

40 Actin structural and dynamical properties can be modulated by an ensemble of environmen-  
 41 tal parameters (Merino et al., 2020; Varland et al., 2019). Especially, the nucleotide state (ATP or  
 42 ADP) changes the internal motions of the G-actin (Ali et al., 2022), and the stability (Reynolds et al.,  
 43 2022) and formation rate (Cooke, 1975) of the filament. Furthermore, this rate is also greatly influ-  
 44 enced by the type and concentration of ions (Nyman et al., 2002; Kang et al., 2012). Beyond these  
 45 two main parameters, recent work has also highlighted the importance of the methylation of histi-  
 46 dine 73, a post-translational modification affecting filament formation (Wilkinson et al., 2019). This  
 47 residue is located on the *sensor loop*. This loop undergoes structural rearrangements depending  
 48 on the nucleotide state (Graceffa and Dominguez, 2003). Thus, histidine 73 methylation, ions con-  
 49 centration, and nucleotide states modulate the actin molecular and supramolecular properties but  
 50 how they coordinate remains elusive.

51 Molecular Dynamics (MD) simulations have become increasingly popular over the last 20 years  
 52 for studying biological systems at different scales (Vanommeslaeghe et al., 2010; Maier et al., 2015;  
 53 Souza et al., 2021; Kim and Hummer, 2008; Chu and Voth, 2005). This method was extensively  
 54 used to characterize properties of actin protein such as differences between nucleotide states  
 55 (Splettstoesser et al., 2009; Saunders et al., 2014; Jepsen and Sept, 2020), waters located in the cavi-  
 56 ty and their impact on protein plasticity and enzymatic properties (Saunders and Voth, 2011; Mc-  
 57 Cullagh et al., 2014), interactions with small molecules (Rennebaum and Caffisch, 2012; Helal et al.,  
 58 2013) and the dynamics of filaments in various environments (Chu and Voth, 2005; Splettstoesser  
 59 et al., 2011; Zsolnay et al., 2020; Schroer et al., 2020; Shamloo and Mehrafrooz, 2018; Jaswandkar  
 60 et al., 2021; Horan et al., 2020; Castaneda et al., 2019) but, to our knowledge, these computational  
 61 works focus exclusively on  $\alpha$ -actin while the  $\beta$ -actin isoform remains understudied.

62 Even if MD simulations have been instrumental in the understanding of how ion and water  
 63 molecules interact with proteins (Song et al., 2013; Kopec et al., 2018; Bellissent-Funel et al., 2016),  
 64 there is still room for improvement. While actin is known to be very plastic and the impact of ions  
 65 and water molecules have been highlighted (Hocky et al., 2016; Kang et al., 2012, 2013), the pre-  
 66 cise parametrization of these components is still challenging and depends on the system studied  
 67 (Kadaoluwa Pathirannahalage et al., 2021). Recent methodological developments on polarizable  
 68 force-fields have drastically increased the accuracy of interactions between these molecules and  
 69 proteins (Shi et al., 2015; Melcr and Piquemal, 2019; Jing et al., 2019, 2021; Lynch et al., 2021;  
 70 El Ahdab et al., 2021; Célerse et al., 2019; Kratochvil et al., 2016; Li et al., 2015; El Houry et al.,  
 71 2022). In addition, the use of enhanced sampling methods allows exploring diverse unknown states  
 72 hard to reach through the use of classical molecular dynamics simulations (Jaffrelot Inizan et al.,

73 **2021; Bowman et al., 2010; Miao et al., 2015; Célerse et al., 2022).**

74 Here, we have deciphered the plasticity of  $\beta$ -actin by performing series of adaptive sampling  
75 simulations combined with the AMOEBA polarizable force field (Table 1). This allows us to assess  
76 the joint effects of histidine 73 methylation with ion concentration and nucleotide state on the  
77 plasticity of the isolated G-actin protein. We have also assessed how nucleotide state affects F-  
78 actin monomer at the barbed end of the filament. This work sheds new light onto the specific  
79 plasticity of the  $\beta$ -actin isoform and how it is finely modulated by several environmental factors.  
80 This may help the development of new strategies which precisely act on this isoform.

## 81 **Results**

### 82 **Role of histidine 73 methylation on the global plasticity of ATP bound G-actin.**

83 We performed 1.52  $\mu$ s long adaptive sampling polarizable molecular dynamics simulations on both  
84  $\alpha$ - and  $\beta$ -actin isoforms containing ATP bound nucleotide and magnesium ion in the catalytic cavity  
85 (+150 mM of KCl). To assess the effect of the methylation of histidine 73 on the G-actin dynamics,  
86 we simulated both non-methylated histidine (HIS73) and methylated histidine (HIC73) and mea-  
87 sured the dihedral angle formed by the four subdomains as well as the distance between SD2 and  
88 SD4, called cleft (Fig 1-A). For the  $\beta$ -actin without methylation, the protein fluctuated around a cleft  
89 of 25 Å and a dihedral angle of c.a.  $-20^\circ$  (Fig 1-B). The histidine methylation clearly broadened the  
90 main basin affecting particularly the cleft distance, allowing a range of cleft distances from 25Å to  
91 27Å, while the dihedral angle was slightly expanded. Thus, the methylation of histidine 73 led to a  
92 global change in the protein dynamics. This is also visible in the RMSF (Fig 1-C) where two areas,  
93 away from histidine 73, are affected by the methylation: the D-loop (Fig 1-A), and the SD4 subdo-  
94 main. More precisely, the dynamics of helices around residues [200-206] and [228-232], situated  
95 at the opposite sides of SD4, were particularly affected by the methylation (Fig 1, D). Interestingly,  
96 even if the sequence identity between  $\alpha$  and  $\beta$ -actin is very high (ca 94%), the histidine methylation  
97 seemed to affect the  $\alpha$  isoform more (Fig S1) than the  $\beta$  isoform. The most affected areas for  $\alpha$ -actin  
98 were comparable (Fig S2) with the ones seen on  $\beta$ -actin. Furthermore, both minima for dihedral  
99 angle and cleft were shifted in comparison to the  $\beta$ -actin isoform with respectively  $-17^\circ$  and 27Å.  
100 Thus, the  $\beta$ -actin seems to display more subtle changes than the  $\alpha$ -actin isoform. This may be re-  
101 lated to their respective function in different tissues. For the following sections, we will focus on  
102 the  $\beta$ -actin isoform as little is known on the dynamics of this protein.

103

### 104 **Histidine 73 methylation, SD2-SD4 bridge, and enzymatic cavity.**

105 The [200-206] helix, situated in the SD4 subdomain, is close to the SD2 subdomain (Fig 1-C,D). For  
106 the non-methylated actin form, residues in this helix interacted with residues on the SD2 domain  
107 to bridge the two subdomains (Fig 2-A, left panel). Especially, GLU 207 formed stable hydrogen  
108 bonds with residue ARG 62 on SD2. With the methylation of histidine 73, these hydrogen bonds  
109 were clearly less stable (Fig 2-A, central panel), allowing the opening of the cleft (Fig 1-B, central  
110 panel). This opening was correlated with an increase of the volume cavity (Fig 2-B,C) passing from  
111 680 Å<sup>3</sup> to 925 Å<sup>3</sup>. Interestingly, for the methylated histidine, a second volume population started  
112 to appear around 870 Å<sup>3</sup>. As this volume change may affect molecules inside the binding site, we  
113 checked the dynamical properties of the magnesium ion and water molecules around it. Even if  
114 the magnesium ion is still largely bound to the  $\gamma$ -phosphate of the ATP, in the methylated system,  
115 a higher unbound population can be observed (with a Mg<sup>2+</sup>- $\gamma$ -phosphate distance of around 4 Å),  
116 suggesting a more dynamical positioning of the magnesium ion (Fig 2-D). This is also correlated  
117 with a wider distribution of water molecules around the magnesium (Fig 2-E). So, histidine 73 may  
118 affect actin organization from the ATP binding site up to subdomain interactions.

119

120 **Evolution of residues pathways bridging SD2 and SD4 subdomains.**

121 Histidine 73 is near the geometrical center of the actin (Fig 1-A). Therefore its impact on SD2 and  
122 SD4 dynamics, especially on residues located at their extremities, doesn't appear obvious at first  
123 sight. This may imply an allosteric pathway to link these residues with the histidine. We there-  
124 fore performed correlation-based dynamical network analysis (*Westerlund et al., 2020; Melo et al.,*  
125 *2020*) to analyze the shortest paths between GLU207 and ARG62, residues involved in the most sta-  
126 ble hydrogen bonds between SD2 and SD4. For actin containing the non methylated histidine, the  
127 2 most representative shortest paths directly linked GLU207 and ARG62 (Fig 3-A, left and central  
128 panels). These two paths were overrepresented in comparison to the other paths (Table S1). The  
129 third most represented shortest path passed by residues PRO70 and GLU72, located on the sensor  
130 loop (Fig 3-A, right panel), displaying different conformations depending on the bound nucleotide  
131 (*Graceffa and Dominguez, 2003*). In this path, the formation of the [GLU72-ARG183] salt bridge  
132 linked the SD2 and SD4 subdomains. Interestingly, for the methylated histidine, residues involved  
133 in this latter path are all present in the most representative shortest path (Fig 3-B, left panel). In this  
134 path, there is no direct interaction between the extremities of SD2 and SD4 subdomains, meaning  
135 that the allosteric connection is achieved through the sensor loop. For the two most representative  
136 shortest paths the methylated histidine 73 was involved, while the third one displayed a SD2-SD4  
137 bridge through interactions between TYR69 and ARG183. Interestingly, in the case of the methyl-  
138 lated histidine 73, the paths propensities are clearly rebalanced with close probabilities for all the  
139 paths (Table S1). Taken together, these results suggest that histidine 73 methylation helps opening  
140 the cleft between SD2 and SD4 subdomain, otherwise mainly closed via the GLU207-ARG61 inter-  
141 actions. This methylation also affects allosteric paths joining SD2 and SD4 extremities rebalancing  
142 different paths and rerouting allosteric communications between the two subdomains via the sen-  
143 sor loop.

144

145 **Modulation of histidine 73 methylation activity by ions.**

146 Magnesium ion concentration plays an important role in actin polymerization (*Kang et al., 2012*).  
147 To analyse the effect of magnesium ions, we have replaced the 150 mM of *KCl* with 75 mM of  
148 *MgCl<sub>2</sub>*. With the addition of magnesium ions, both cleft and dihedral angles were affected with  
149 respectively an increase in cleft opening (up to 30 Å) and dihedral angle (up to -30°) (Fig 1-B, right  
150 panel). The distribution of Mg<sup>2+</sup> ions around the protein showed numerous areas of ions interac-  
151 tions spread on all the four subdomains (Fig S3). The residues were almost all negatively charged.  
152 Interestingly, GLU 72 on the sensor loop, was among the interacting residues. The RMSF (Fig 1-C)  
153 as well as the volume of the ATP binding cavity were affected by the addition of magnesium ions.  
154 The latter displayed a larger volume than without ions (Fig 1-C). The distribution of water molecules  
155 in the cavity is however quite narrow (Fig 1-E) with a Mg<sup>2+</sup> ion in the cavity as stable as seen for the  
156 histidine 73 not methylated (Fig 1-D). The addition of magnesium ions also changed the allosteric  
157 paths between GLU207 and ARG62. As seen previously, the probability of apparition of the three  
158 most representative paths are relatively similar (Table S1). Interestingly, the most frequent path is  
159 no longer passing through the sensor loop but on the opposite side of the binding cavity (Fig 3-C,  
160 left panel). Hence, the addition of magnesium ions has a contrasted effect on the actin plasticity.  
161 On one hand, it favors the opening of the cleft and increases the dihedral angle. On the other hand,  
162 it limits the destabilizing effect of the histidine methylation at the binding site.

163

164 **Limitation of actin plasticity by ADP nucleotide.**

165 The type of nucleotide inside the enzymatic cavity seems to affect actin internal dynamics (*Ali et al.,*  
166 *2022*). Therefore, we have performed additional simulations with ADP in the binding cavity to  
167 compare with ATP bound actin. In presence of ADP, the enhanced internal flexibility of the actin  
168 monomer observed in the SD4 subdomain, for methylated histidine 73, was partially cancelled as

169 shown by a reduced RMSF (Fig 4-A). Both methylation of histidine 73 and addition of magnesium  
170 ions have little to no effect on the distribution of the dihedral angle and the cleft distance (Fig 4-B).  
171 This can be explained by sustained interactions between residues at the SD2-SD4 interface even  
172 with histidine methylation and magnesium ions (Fig 4-C). In this *closed* conformation, the volume of  
173 the binding cavity fluctuated less than in the ATP systems (Fig 4-D). Some differences can be noted  
174 regarding the positioning of the nucleotide and its bound magnesium (Fig 4-E). In the case of methy-  
175 lated histidine, the magnesium ion inside the cavity was not directly bound to the  $\beta$ -phosphate of  
176 the ADP. It could be related to the higher number of water molecules structured around the ion  
177 (Fig 4-F). Similarly to ATP-bound systems, the addition of magnesium ions increased the cavity  
178 volume (Fig 4-D) but the impact is less pronounced. The distribution of water molecules around  
179 the magnesium ion was then slightly larger (Fig 4-F) and reequilibrated the population of bound  
180 magnesium ion in the cavity (Fig 4-E). Finally, the allosteric paths between SD2 and SD4 were also  
181 affected by the binding of ADP comprising fewer residues (Table S1). This resulted in shorter paths  
182 (Fig 4-G,H) mainly involving a direct interaction between ARG 62 and GLY 207 or passing through  
183 the TYR69-ARG183 interaction. Thus, for ADP binding, the actin was in a closed state and allosteric  
184 paths involved less the sensor loop for the correlation between SD2 and SD4 subdomains limiting  
185 the impact of histidine 73 methylation.

186

### 187 **Impact of the K118N mutation on actin dynamics.**

188 The K118N mutation is known to enhance actin polymerization and nucleation (*Ali et al., 2022*;  
189 *Kruth and Rubenstein, 2012*). To understand the potential impact of this mutation on the actin  
190 dynamics, we performed simulations of this mutant in the presence of ATP or ADP. In the pres-  
191 ence of ATP, the Cleft-dihedral map (Fig S1) revealed an actin conformation in a more open state  
192 ( $[-24^\circ; 26.5\text{\AA}]$ ) similar to conformations seen in the case of histidine methylation with addition of  
193 magnesium ions but locked around a specific minimum. In the presence of ADP, the mutation had  
194 a very low impact on the cleft-dihedral map. Thus, the K118N mutation favors a specific, open,  
195 conformation.

196

### 197 **F-Actin plasticity at the barbed end.**

198 We then studied the conformational dynamics of actin monomers at the extremity of a filament.  
199 We were especially interested by the barbed end, the most dynamic end, where ATP-G-actin monomers  
200 are primarily added (*Merino et al., 2020*). To do so, we performed simulations of a short filament  
201 containing four F-actin monomers whose the two last monomers at pointed end were constrained  
202 to mimic a longer filament (see details in the Method section). Each actin monomer contained the  
203 methylation of histidine 73 and were simulated with ATP or ADP. As done for the G-actin monomer  
204 systems, we carried out 1.52  $\mu\text{s}$  long adaptive sampling polarizable molecular dynamics simula-  
205 tions. We assessed the dynamics of the last (B) and penultimate (B-1) monomers at the barbed  
206 end (Fig 5-A), which seem to experience major deformations (*Zsolnay et al., 2020*). Contrary to  
207 G-actin structure, the largest changes of the last F-actin monomer were observed for the binding  
208 of ADP while these changes were limited for ATP binding (Fig 5-A and Fig S6-A). Specifically, with  
209 ADP, the cleft-dihedral map displayed values tending to reach the ones observed for the G-actin  
210 monomers (Fig 4-B) while the B monomer stayed in a more flatten configuration when ATP nu-  
211 cleotide is bound. The B-1 subunit appeared to be less affected by the nucleotide state, probably  
212 due to a higher number of contacts with the other monomers in the filament (Fig S5, S6). Neverthe-  
213 less, the B-1 subunit explored larger cleft distances in the ADP bound form than in the ATP bound  
214 form (Fig S5). For both B and B-1 subunits, the dynamics of the 220-230 helix (Fig 4-C) is the most af-  
215 fected (Fig S6). This helix from the B subunit strongly interacted with the C-terminal residues of the  
216 B-1 subunit for bound ADP but not in the case of bound ATP (Fig 4-D). This C-terminal part interacts  
217 with the D-loop of incoming actin monomer (*Durer et al., 2012*). Thus, the ADP bound actin may

218 compete with the D-loop from an approaching actin monomer delaying the filament elongation.

## 219 Discussion

220 Actin has been one of the most studied proteins by theoretical means over the last 20 years, in  
221 monomer (*Splettstoesser et al., 2009; Saunders and Voth, 2011; Saunders et al., 2014; McCullagh*  
222 *et al., 2014; Jepsen and Sept, 2020*) or in filament (*Chu and Voth, 2005; Hocky et al., 2016; Jepsen*  
223 *and Sept, 2020; Zsolnay et al., 2020*). All of these theoretical works have been achieved using clas-  
224 sical atomistic force fields with a fixed partial charge on each atom. The recent developments of  
225 Tinker-HP (*Lagardère et al., 2015; Lipparini et al., 2014; Lagardère et al., 2018; Lagardère et al.,*  
226 *2019; Adjoua et al., 2021*) has opened the door to study biological systems with polarizable force-  
227 field reaching simulations time up to several microseconds (*Jaffrelot Inizan et al., 2021; El Ahdab*  
228 *et al., 2021*). In this study we have performed a series of adaptive sampling simulations using the  
229 AMOEBA polarizable force field on 12 different actin systems (Table 1), reaching a total of more  
230 than 18  $\mu$ s of simulation. This demonstrated how it is now possible to study structural changes  
231 in large biomolecular systems using a polarizable force field. We focused our work on  $\beta$ -actin, an  
232 important isoform not yet studied by molecular dynamics simulations. Our results highlights the  
233 differences between  $\alpha$ -actin and  $\beta$ -actin isoforms in term of dynamical behaviour (Fig S1) prompt-  
234 ing us to further investigate this isoform.

235 The methylation of histidine 73, a post translational modification conserved in several animals  
236 (*Johnson et al., 1967*), has recently regained interest following the structure determination of the  
237 SETD3 methyltransferase (*Kwiatkowski et al., 2018; Wilkinson et al., 2019*). Actin purified from  
238 Setd3 knockout shows an increased rate of nucleotide exchange and decreased polymerization  
239 kinetics (*Wilkinson et al., 2019*). Additionally, Setd3 knockout cells show a decrease in F-actin  
240 content, which is consistent with the prediction that methylation increases actin filament stability  
241 (*Kwiatkowski et al., 2018*). Our results showed an enhanced dynamics of the actin monomer once  
242 methylated, in the ATP state, in both  $\alpha$  and  $\beta$  isoforms (Fig 1 and Fig S1). This resulted in the opening  
243 of the cleft due to the disruption of direct interactions between ARG 62 and GLU 207 respectively  
244 on SD2 and SD4 subdomains (Fig 2) which may help the structural adaptation of the actin monomer  
245 at the extremity of the filament. Furthermore, ARG 62 and GLU 207 residues are also involved in  
246 inter-monomer interactions in the filament (*Oda et al., 2009*). Thus, intra-monomer interactions  
247 may compete with inter-monomer interactions during the process of filament elongation and nu-  
248 cleation which may delay the formation of actin filament. Our results showed how breaking these  
249 interactions via the introduction of histidine methylation may thus explain an increase in actin fil-  
250 ament nucleation. Our results also highlighted that without the histidine methylation the cavity  
251 volume is quite narrow and the number of water molecules in the cavity smaller (Fig 2-C,E). This  
252 can be related to the water network which may play an important role in the hydrolysis of the  
253 ATP (*McCullagh et al., 2014*). The histidine methylation may then modify the organisation of water  
254 molecules with an increase of cavity volume and number of water molecules (Fig 2-C,E) thus mod-  
255 ulating the ATP hydrolysis, otherwise prematurely started in non-methylated actin (*Nyman et al.,*  
256 *2002*).

257 Previous works have shown how the magnesium ions concentration enhances actin polymer-  
258 ization (*Kang et al., 2012*). Here, the addition of magnesium ions enhanced the actin flexibility and  
259 increased the cleft distance for the ATP bound state with histidine methylation (Fig 1-B). This can  
260 further link the opening of the actin with its ability to adapt and interact with other actin subunits  
261 at the filament extremities. Interestingly, the K118N mutation, known to enhance actin polymer-  
262 ization (*Ali et al., 2022*), locked the actin structure in an open state (Fig S1, S2).

263 Actin protein seems less likely to polymerize in the presence of ADP (*Cooke, 1975*). Here, we  
264 have shown that the plasticity of the actin is drastically affected in the presence of ATP limiting  
265 the opening of the cleft for all the studied conditions (Fig 4-B). Thus ADP binding may lock the  
266 actin monomer in an closed state (Fig 4-G) which may prevent it from easily adapting its structure  
267 to elongate the filament. Furthermore, at the the barbed end, F-actin with ADP bound displayed

268 larger structural deformations towards a G-actin form while F-actin with ATP bound seemed more  
269 stable (Fig 5-B). Interestingly, the F-actin with ADP bound started interacting with the C-terminal  
270 part of the penultimate subunit (Fig 5-C,D) which may prevent the interaction of an incoming actin  
271 monomer via its D-loop (Zsolnay et al., 2020; Durer et al., 2012). Thus, by stabilizing G-actin closed  
272 form and destabilizing F-actin form, the ADP may limit the polymerization of the actin filament.

273 Using correlation-based dynamical network analysis (Fig 3, Fig 4-G, and Fig S4) we were able to  
274 link actin flexibility with different paths between the SD2 and SD4 subdomains. Regarding the ATP-  
275 bound systems, these paths mainly involved the sensor loop in the open state. Conversely, paths  
276 observed in ADP bound states almost never involved this loop, minimizing the histidine methyl-  
277 ation effects on SD2-SD4 mobility. Altogether, these may give a first clue on allosteric pathways  
278 linking molecular rearrangements in the binding site to large conformational changes at the actin  
279 extremities.

280 Taken together, our results highlight how the post translational modification of histidine 73 can  
281 change the dynamical properties of actin structure and can act in concert with other parameters  
282 such as the type of nucleotide and ions. By bridging changes at the molecular level to structural  
283 flexibility, these results highlight allosteric paths which may be targeted by ligands in order to cre-  
284 ate specific allosteric modulators of the  $\beta$ -actin isoform.

## 285 **Methods and Materials**

### 286 **Systems preparation**

287 The initial structures of the Actin monomer in the ATP and ADP were obtained from the 1NWK(Graceffa  
288 and Dominguez, 2003) and 1J6Z(Otterbein et al., 2001) pdb files respectively. In the ATP state, the  
289  $\alpha$  and  $\beta$ -actin sequences were used. As the N-terminal acetylation or arginylation of the  $\beta$ -actin is  
290 known to have diverse biological effects (Varland et al., 2019; Chen and Kashina, 2021), we decided  
291 to remove the N-terminal amino acid, starting our  $\beta$ -actin sequence at ASP2. The N-terminal and  
292 C-terminal extremities and the D-loop were generated using modeller(Sali and Blundell, 1993). In  
293 the original pdb files, the nucleotide is under the form of AMP and in presence of a calcium ion. We  
294 morphed the AMP into ATP and replaced the calcium ion for a magnesium ion, to stick closer to  
295 physiological conditions. It has been demonstrated that crystallographic water molecules located  
296 inside the cavity may impact the behaviour of the protein(Saunders and Voth, 2011). Therefore,  
297 the water molecules placed at less than 10Åof the magnesium ion were kept at the start of the  
298 simulation. In addition to the monomer systems, two 4-mer systems were prepared based on the  
299 6BNO(Gurel et al., 2017) pdb file, in presence of ADP and ATP. For the ATP state, the ADP has been  
300 morphed into ATP. The N-terminal and C-terminal extremities only were generated using modeller.  
301 For all systems, the residues have been protonated following the results of PROPKA3(Olsson et al.,  
302 2011). All systems were solvated in water boxes using the xyzedit tool of the Tinker-hp distribu-  
303 tion(Rackers et al., 2018), so that there was at least 20Åbetween two images of the protein. The  
304 systems were then neutralized and KCL atoms were added to reach 150mM concentration. Regard-  
305 ing the simulations at high MG2+ ions concentrations, all K+ atoms were replaced by half number  
306 of MG2+ ions. The force field parameters used for the protein parameters was the AMOEBA Pol-  
307 arizable force field for proteins(Shi et al., 2013). Previously published parameters were used for  
308 the ATP and ADP systems(Walker et al., 2020). The parameters of the HIC73 residues were de-  
309 veloped following the procedure used to develop the AMOEBA force field for proteins. All QM  
310 calculations were performed using Gaussian09(Frisch et al., 2009). The model residue used to de-  
311 velop the parameters was a dipeptide Ac-HIC-NME were the Ac, NME and backbone parameters  
312 were extracted from the AMOEBABIO18 force field(citep amoeba nucleic acids). Briefly, geometry  
313 optimisation were carried out at the MP2/6-31G\* level. Initial atomic multipoles were derived at  
314 the MP2/6-311G\*\* level using the Distributed Dipole Analysis (DMA) procedure(Stone, 1981). The  
315 resulting atomic multipôles were optimized against MP2/aug-cc-pvtz electrostatic potential on a set  
316 of grid points distributed around the dipeptide. During this fitting, the monopoles were held fixed.

317 The point charges were adjusted at the junction atom between the backbone and the sidechain  
318 (adjustment of 0.03 on the -CH2- carbon atom charge), to insure electrical neutrality. As realised  
319 in the original AMOEBA for protein publication, 3 conformations were used to realize the fitting of  
320 the dipôle and multipôle components. The valence, vdW and torsional parameters were extracted  
321 from the AMOEBA parameters of the classical HIS residue.

### 322 **Simulation setup**

323 All molecular dynamics simulations were performed using the GPU version of the Tinker-HP soft-  
324 ware (*Adjoua et al., 2021*). During the calculations, periodic boundary conditions were employed  
325 using the Particle Mesh Ewald method. The van der Waals and PME cutoffs were respectively of  
326 12 Å and 7 Å. An analytical long range correction of the vdW parameters has been used. The dipole  
327 convergence criterion of the preconditioned conjugate gradient polarization solver was set up to  
328 0.01 Debye/atom for the minimization steps, and to 0.00001 Debye/atom otherwise. For the mini-  
329 mization steps, no polarization or multipole terms were used. The systems underwent a minimiza-  
330 tion of 30 000 step using the steepest descent algorithm. The next equilibration steps were realised  
331 by using a timestep of 1fs, the RESPA propagator and the berendsen barostat (when relevant) un-  
332 less stated otherwise. The solvent was then progressively heat up in the NVT ensemble, coming  
333 from 5K to 300K using 10K steps and spending 5ps at each temperature, before undergoing addi-  
334 tional 100ps at 300K. The system was then allow to slowly relax 3x 400ps in the NPT ensemble while  
335 applying harmonic constraints 10, 5 and finally 1 kcal/mol on the backbone atoms of the protein.  
336 At this point, all restraints were removed from the systems, and we used the montecarlo barostat  
337 in combination with the BAOAB-RESPA1 (*Lagardère et al., 2019*) propagator. Three final equilibra-  
338 tion steps were performed during 100ps, 200ps and 500 ps by respectively increasing the outer  
339 timestep from 1fs to 2s, then 5fs. Regarding the production run, all calculations were performed  
340 in the NPT ensemble, using the montecarlo barostat and the BAOAB-RESPA1 propagator with an  
341 outer timestep of 5fs, and hydrogen mass repartitioning. A first 10ns simulations was performed to  
342 generate a first set of structures. In order to maximize the space exploration on our system, we  
343 then realized a procedural adaptive sampling procedure: a certain number of structures were first  
344 extracted from this initial simulation to perform the first adaptive sampling round. The seeds are  
345 chosen following a procedure already described (*Jaffrelot Inizan et al., 2021*). Briefly, a principal  
346 component analysis is performed on the 10ns simulation using the scikit-learn (*Pedregosa et al.,*  
347 *2011*) and MDTraj (*McGibbon et al., 2015*) packages from which the n=4 first principal modes are  
348 considered (note: 10 modes are calculated). The density  $\rho_k$  of the collective variables is then pro-  
349 jected on the 4 modes and approximated using a Gaussian density kernel estimator:

$$\rho_k(x_i) = \frac{1}{(2\pi\sigma^2)^{n/2} M_k} \sum_{i=1}^{M_k} \exp - \frac{|x - x_i|^2}{2\sigma^2} \quad (1)$$

350 With the  $\sigma$  bandwidth being chosen with the D.W Scott method of Scipy (*Virtanen et al., 2020*),  
351  $M_k$  being the total number of configurations,  $x_i$  the orthogonal projection of the configuration on  
352 the n PCA modes. Then a bias is introduced to the selection of a new seed  $x_i$  under the following  
353 form :

$$P(i) = \frac{\rho_k^{-1}(x_i)}{\sum_{j=1}^{M_k} \rho_k^{-1}(x_j)} \quad (2)$$

354 The probability of selecting the  $x_i$  structure is inversely proportional to its density, projected  
355 on the first 4 PCA components. This allows to equalize the chances of selecting rare structures as  
356 well as highly present ones, allowing to search for new, undiscovered structural states. Following  
357 this, 10 ns simulations are set up and will form the new space of structures for the next adaptive  
358 sampling round. For each following round, all simulations will be added to the space of structured



**Table 2.** Number of seeds of each round of Adaptive sampling.

| 1st    | 2nd to 10th | total simulation time |
|--------|-------------|-----------------------|
| 8*10ns | 16*10ns     | 1.52 $\mu$ s          |

**Table 3.** Definition of each subdomain

|          | SD1                       | SD2            | SD3                | SD4                |
|----------|---------------------------|----------------|--------------------|--------------------|
| Residues | 5-33<br>80-147<br>334-349 | 34-39<br>52-69 | 148-179<br>273-333 | 180-219<br>252-262 |

359 on which the next adaptive sampling will be performed. The number of seeds used on each round  
360 is summed in Table 2. Regarding the 4-mer systems, we were interested in the behaviour of the  
361 barbed end only. For this extremity, it has recently been demonstrated that the behaviour of the B  
362 and B-1 residues is different of other residues of the filament. Therefore, to simulate the behaviour  
363 of this extremity only, the backbone atoms of two monomers forming the pointed end have been  
364 constrained using a 10kcal/mol restraint. This way, it was possible to study the evolution of the  
365 barbed end in a constrained filament, while keeping the sidechains free. Finally, 1.52  $\mu$ s long simu-  
366 lations were generated on eight monomer systems and two 4-mer systems, resulting in a total of  
367 18.24  $\mu$ s.

### 368 Analysis

369 Most quantities has been calculated using the VMD software(*Humphrey et al., 1996*). Regarding  
370 the cavity, volumes have been computed with E-pock(*Laurent et al., 2015*). Finally, shortest paths  
371 have been calculated using the Dynetan tool(*Melo et al., 2020*). Each of the observable had to be  
372 reweighted to take into account the bias introduced by the adaptive sampling. For this purpose,  
373 the unbiasing factor  $\alpha_i$  of each seed is defined as :

$$\alpha_i = \frac{1}{M_k P(i)} \quad (3)$$

374 The final weight of each seed is then :

$$\omega_i = \frac{\alpha_i}{\sum_j \alpha_j} \quad (4)$$

375 The dihedral and cleft angle has been defined following the work of Saunders and cowork-  
376 ers(*Saunders et al., 2014*): Dihedral = SD2-SD1-SD3-SD4, Cleft = SD2-SD4 distance. To compute  
377 these quantities, the center of mass of each subdomains have been defined as following:

378 The volume of the cavity has been calculated by defining a 6Åsphere around the N1, N9, PA, PG  
379 (PB for ADP) atoms of the nucleotide and one additional sphere around the MG2+ ion coordinated  
380 to it. For the calculation of shortest paths, the shortest path of each seed has been calculated  
381 on the 10ns. Then all found shortest paths were reweighted accross all seeds, and the 3 highest  
382 shortest paths have been kept for figures. All shortest paths accounting for more than 3 percent  
383 of all paths are available in supplementary informations.

### 384 Acknowledgments

385 A. D. is funded by the ITMO Cancer of Aviesan "Mathematiques et Informatique". This work has also  
386 received funding from the European Research Council (ERC) under the European Union's Horizon  
387 2020 research and innovation program (grant agreement No 810367), project EMC2 (JPP). This work  
388 was granted access to the HPC resources of CALMIP supercomputing center (under the allocation  
389 2021-P21020) and TGCC Joliot-Curie supercomputer (under the GENCI allocation A0110712941).

## References

- 390  
391 **Adjoua O**, Lagardère L, Jolly LH, Durocher A, Very T, Dupays I, Wang Z, Inizan TJ, Célerse F, Ren P, Ponder  
392 JW, Piquemal JP. Tinker-HP: Accelerating Molecular Dynamics Simulations of Large Complex Systems with  
393 Advanced Point Dipole Polarizable Force Fields Using GPUs and Multi-GPU Systems. *Journal of Chemical*  
394 *Theory and Computation*. 2021; 17(4):2034–2053. doi: [10.1021/acs.jctc.0c01164](https://doi.org/10.1021/acs.jctc.0c01164).
- 395 **Ali R**, Zahm JA, Rosen MK. Bound nucleotide can control the dynamic architecture of monomeric actin. *Nature*  
396 *Structural & Molecular Biology*. 2022 Apr; 29(4):320–328. <https://doi.org/10.1038/s41594-022-00743-5>, doi:  
397 10.1038/s41594-022-00743-5.
- 398 **Bellissent-Funel MC**, Hassanali A, Havenith M, Henchman R, Pohl P, Sterpone F, van der Spoel D, Xu Y, Garcia  
399 AE. Water Determines the Structure and Dynamics of Proteins. *Chemical Reviews*. 2016; 116(13):7673–7697.  
400 <https://doi.org/10.1021/acs.chemrev.5b00664>, doi: [10.1021/acs.chemrev.5b00664](https://doi.org/10.1021/acs.chemrev.5b00664), PMID: 27186992.
- 401 **Blanchoin L**, Pollard TD. Hydrolysis of ATP by Polymerized Actin Depends on the Bound Divalent Cation but Not  
402 Profilin. *Biochemistry*. 2002 Jan; 41(2):597–602. <https://doi.org/10.1021/bi011214b>, doi: 10.1021/bi011214b.
- 403 **Bowman GR**, Ensign DL, Pande VS. Enhanced Modeling via Network Theory: Adaptive Sampling of Markov State  
404 Models. *Journal of Chemical Theory and Computation*. 2010; 6(3):787–794. <https://doi.org/10.1021/ct900620b>,  
405 doi: 10.1021/ct900620b, PMID: 23626502.
- 406 **Castaneda N**, Lee M, Rivera-Jacquez HJ, Marracino RR, Merlino TR, Kang H. Actin Filament Mechanics and  
407 Structure in Crowded Environments. *The Journal of Physical Chemistry B*. 2019; 123(13):2770–2779. <https://doi.org/10.1021/acs.jpcc.8b12320>, doi: [10.1021/acs.jpcc.8b12320](https://doi.org/10.1021/acs.jpcc.8b12320), PMID: 30817154.
- 408  
409 **Chen L**, Kashina A. Post-translational Modifications of the Protein Termini. *Frontiers in Cell and*  
410 *Developmental Biology*. 2021; 9. <https://www.frontiersin.org/articles/10.3389/fcell.2021.719590>, doi:  
411 [10.3389/fcell.2021.719590](https://doi.org/10.3389/fcell.2021.719590).
- 412 **Chu JW**, Voth GA. Allostery of actin filaments: Molecular dynamics simulations and coarse-grained analysis.  
413 *Proceedings of the National Academy of Sciences*. 2005; 102(37):13111–13116. [https://www.pnas.org/doi/](https://www.pnas.org/doi/abs/10.1073/pnas.0503732102)  
414 [abs/10.1073/pnas.0503732102](https://www.pnas.org/doi/abs/10.1073/pnas.0503732102), doi: [10.1073/pnas.0503732102](https://doi.org/10.1073/pnas.0503732102).
- 415 **Cooke R**. Role of the bound nucleotide in the polymerization of actin. *Biochemistry*. 1975; 14(14):3250–3256.  
416 <https://doi.org/10.1021/bi00685a035>, doi: 10.1021/bi00685a035, PMID: 1148203.
- 417 **Célerse F**, Inizan TJ, Lagardère L, Adjoua O, Monmarché P, Miao Y, Derat E, Piquemal JP. An Efficient Gaussian-  
418 Accelerated Molecular Dynamics (GaMD) Multilevel Enhanced Sampling Strategy: Application to Polarizable  
419 Force Fields Simulations of Large Biological Systems. *Journal of Chemical Theory and Computation*. 2022;  
420 18(2):968–977. doi: [10.1021/acs.jctc.1c01024](https://doi.org/10.1021/acs.jctc.1c01024), PMID: 35080892.
- 421 **Célerse F**, Lagardère L, Derat E, Piquemal JP. Massively Parallel Implementation of Steered Molecular Dynamics  
422 in Tinker-HP: Comparisons of Polarizable and Non-Polarizable Simulations of Realistic Systems. *Journal of*  
423 *Chemical Theory and Computation*. 2019; 15(6):3694–3709. <https://doi.org/10.1021/acs.jctc.9b00199>, doi:  
424 [10.1021/acs.jctc.9b00199](https://doi.org/10.1021/acs.jctc.9b00199), PMID: 31059250.
- 425 **Durer Z**, Kudryashov D, Sawaya M, Altenbach C, Hubbell W, Reisler E. Structural States and Dynamics of the  
426 D-Loop in Actin. *Biophysical Journal*. 2012; 103(5):930–939. [https://www.sciencedirect.com/science/article/pii/](https://www.sciencedirect.com/science/article/pii/S0006349512008065)  
427 [S0006349512008065](https://www.sciencedirect.com/science/article/pii/S0006349512008065), doi: <https://doi.org/10.1016/j.bpj.2012.07.030>.
- 428 **El Ahdab D**, Lagardère L, Inizan TJ, Célerse F, Liu C, Adjoua O, Jolly LH, Gresh N, Hobaika Z, Ren P, Maroun  
429 RG, Piquemal JP. Interfacial Water Many-Body Effects Drive Structural Dynamics and Allosteric Interac-  
430 tions in SARS-CoV-2 Main Protease Dimerization Interface. *The Journal of Physical Chemistry Letters*. 2021;  
431 12(26):6218–6226. doi: [10.1021/acs.jpcl.1c01460](https://doi.org/10.1021/acs.jpcl.1c01460), PMID: 34196568.
- 432 **El Khoury L**, Jing Z, Cuzzolin A, Deplano A, Loco D, Sattarov B, Hédin F, Wendeborn S, Ho C, El Ahdab D,  
433 Jaffrelot Inizan T, Sturlese M, Sosic A, Volpiana M, Lugato A, Barone M, Gatto B, Macchia ML, Bellanda  
434 M, Battistutta R, et al. Computationally driven discovery of SARS-CoV-2 Mpro inhibitors: from design  
435 to experimental validation. *Chem Sci*. 2022; 13:3674–3687. <http://dx.doi.org/10.1039/D1SC05892D>, doi:  
436 [10.1039/D1SC05892D](https://doi.org/10.1039/D1SC05892D).
- 437 **Frisch MJ**, Trucks GW, Schlegel HB, Scuseria GE, Robb MA, Cheeseman JR, Scalmani G, Barone V, Mennucci B,  
438 Petersson GA, Nakatsuji H, Caricato M, Li X, Hratchian HP, Izmaylov AF, Bloino J, Zheng G, Sonnenberg JL,  
439 Hada M, Ehara M, et al., Gaussian 09 Revision A.2; 2009.

- 440 **Graceffa P**, Dominguez R. Crystal structure of monomeric actin in the ATP state: Structural basis of nucleotide-  
441 dependent actin dynamics. *Journal of Biological Chemistry*. 2003; 278(36):34172–34180. [http://dx.doi.org/](http://dx.doi.org/10.1074/jbc.M303689200)  
442 [10.1074/jbc.M303689200](http://dx.doi.org/10.1074/jbc.M303689200), doi: [10.1074/jbc.M303689200](https://doi.org/10.1074/jbc.M303689200).
- 443 **Gurel PS**, Kim LY, Ruijgrok PV, Omabegho T, Bryant Z, Alushin GM. Cryo-EM structures reveal specializa-  
444 tion at the myosin VI-actin interface and a mechanism of force sensitivity. *eLife*. 2017; 6(Md):1–33. doi:  
445 [10.7554/eLife.31125](https://doi.org/10.7554/eLife.31125).
- 446 **Helal MA**, Khalifa S, Ahmed S. Differential Binding of Latrunculins to G-Actin: A Molecular Dynamics Study.  
447 *Journal of Chemical Information and Modeling*. 2013; 53(9):2369–2375. <https://doi.org/10.1021/ci400317j>,  
448 doi: [10.1021/ci400317j](https://doi.org/10.1021/ci400317j), pMID: 23988111.
- 449 **Hocky GM**, Baker JL, Bradley MJ, Sinitskiy AV, De La Cruz EM, Voth GA. Cations Stiffen Actin Filaments by Adher-  
450 ing a Key Structural Element to Adjacent Subunits. *The Journal of Physical Chemistry B*. 2016; 120(20):4558–  
451 4567. <https://doi.org/10.1021/acs.jpcc.6b02741>, doi: [10.1021/acs.jpcc.6b02741](https://doi.org/10.1021/acs.jpcc.6b02741), pMID: 27146246.
- 452 **Horan BG**, Hall AR, Vavylonis D. Insights into Actin Polymerization and Nucleation Using a Coarse-Grained  
453 Model. *Biophysical Journal*. 2020; 119(3):553–566. [https://www.sciencedirect.com/science/article/pii/](https://www.sciencedirect.com/science/article/pii/S0006349520304951)  
454 [S0006349520304951](https://www.sciencedirect.com/science/article/pii/S0006349520304951), doi: <https://doi.org/10.1016/j.bpj.2020.06.019>.
- 455 **Humphrey W**, Dalke A, Schulten K. VMD: Visual Molecular Dynamics. *Journal of molecular graphics*. 1996;  
456 14(October 1995):33–38. <https://www.tapbiosystems.com/tap/products/index.htm>.
- 457 **Jaffrelot Inizan T**, Célerse F, Adjoua O, El Haddad D, Jolly LH, Liu C, Ren P, Montes M, Lagarde N, Lagardère  
458 L, Monmarché P, Piquemal JP. High-resolution mining of the SARS-CoV-2 main protease conformational  
459 space: supercomputer-driven unsupervised adaptive sampling. *Chemical Science*. 2021; 12(2003). doi:  
460 [10.1039/d1sc00145k](https://doi.org/10.1039/d1sc00145k).
- 461 **Jaswandkar SV**, Faisal HMN, Katti KS, Katti DR. Dissociation Mechanisms of G-actin Subunits Govern Deform-  
462 ation Response of Actin Filament. *Biomacromolecules*. 2021; 22(2):907–917. [https://doi.org/10.1021/acs.](https://doi.org/10.1021/acs.biomac.0c01602)  
463 [biomac.0c01602](https://doi.org/10.1021/acs.biomac.0c01602), doi: [10.1021/acs.biomac.0c01602](https://doi.org/10.1021/acs.biomac.0c01602), pMID: 33481563.
- 464 **Jepsen L**, Sept D. Effects of Nucleotide and End-Dependent Actin Conformations on Polymerization. *Biophysical*  
465 *Journal*. 2020; 119(9):1800–1810. <https://www.sciencedirect.com/science/article/pii/S0006349520307359>, doi:  
466 <https://doi.org/10.1016/j.bpj.2020.09.024>.
- 467 **Jing Z**, Liu C, Cheng SY, Qi R, Walker BD, Piquemal JP, Ren P. Polarizable Force Fields for Biomolecular Simula-  
468 tions: Recent Advances and Applications. *Annu Rev Biophys*. 2019 Mar; 48:371–394.
- 469 **Jing Z**, Rackers JA, Pratt LR, Liu C, Rempe SB, Ren P. Thermodynamics of ion binding and occupancy in potassium  
470 channels. *Chem Sci*. 2021; 12:8920–8930. <http://dx.doi.org/10.1039/D1SC01887F>, doi: [10.1039/D1SC01887F](https://doi.org/10.1039/D1SC01887F).
- 471 **Johnson P**, Harris CI, Perry SV. 3-Methylhistidine in actin and other muscle proteins. *Biochemical Journal*. 1967  
472 10; 105(1):361–370. <https://doi.org/10.1042/bj1050361>, doi: [10.1042/bj1050361](https://doi.org/10.1042/bj1050361).
- 473 **Kadaoluwa Pathirannahalage SP**, Meftahi N, Elbourne A, Weiss ACG, McConville CF, Padua A, Winkler DA,  
474 Costa Gomes M, Greaves TL, Le TC, Besford QA, Christofferson AJ. Systematic Comparison of the Structural  
475 and Dynamic Properties of Commonly Used Water Models for Molecular Dynamics Simulations. *Journal of*  
476 *Chemical Information and Modeling*. 2021; 61(9):4521–4536. <https://doi.org/10.1021/acs.jcim.1c00794>, doi:  
477 [10.1021/acs.jcim.1c00794](https://doi.org/10.1021/acs.jcim.1c00794), pMID: 34406000.
- 478 **Kang H**, Bradley MJ, McCullough BR, Pierre A, Grintsevich EE, Reisler E, Cruz EMDL. Identification of cation-  
479 binding sites on actin that drive polymerization and modulate bending stiffness. *Proceedings of the National*  
480 *Academy of Sciences*. 2012; 109(42):16923–16927. <https://www.pnas.org/doi/abs/10.1073/pnas.1211078109>,  
481 doi: [10.1073/pnas.1211078109](https://doi.org/10.1073/pnas.1211078109).
- 482 **Kang H**, Bradley M, Elam W, De La Cruz E. Regulation of Actin by Ion-Linked Equilibria. *Biophysical Jour-*  
483 *nal*. 2013; 105(12):2621–2628. <https://www.sciencedirect.com/science/article/pii/S0006349513012009>, doi:  
484 <https://doi.org/10.1016/j.bpj.2013.10.032>.
- 485 **Kim YC**, Hummer G. Coarse-grained Models for Simulations of Multiprotein Complexes: Application to Ubiqui-  
486 tin Binding. *Journal of Molecular Biology*. 2008; 375(5):1416–1433. [https://www.sciencedirect.com/science/](https://www.sciencedirect.com/science/article/pii/S0022283607015628)  
487 [article/pii/S0022283607015628](https://www.sciencedirect.com/science/article/pii/S0022283607015628), doi: <https://doi.org/10.1016/j.jmb.2007.11.063>.
- 488 **Kopeck W**, Köpfer DA, Vickery ON, Bondarenko AS, Jansen TLC, de Groot BL, Zachariae U. Direct knock-on of  
489 desolvated ions governs strict ion selectivity in K<sup>+</sup> channels. *Nature Chemistry*. 2018 Aug; 10(8):813–820.  
490 <https://doi.org/10.1038/s41557-018-0105-9>, doi: [10.1038/s41557-018-0105-9](https://doi.org/10.1038/s41557-018-0105-9).

- 491 **Kratochvil HT**, Carr JK, Matulef K, Annen AW, Li H, Maj M, Ostmeier J, Serrano AL, Raghuraman H, Moran SD,  
492 Skinner JL, Perozo E, Roux B, Valiyaveetil FI, Zanni MT. Instantaneous ion configurations in the K<sup>+</sup>  
493 ion channel selectivity filter revealed by 2D IR spectroscopy. *Science*. 2016; 353(6303):1040–1044. <https://www.science.org/doi/abs/10.1126/science.aag1447>, doi: 10.1126/science.aag1447.
- 495 **Kruth KA**, Rubenstein PA. Two Deafness-causing (DFNA20/26) Actin Mutations Affect Arp2/3-dependent Actin  
496 Regulation\*. *Journal of Biological Chemistry*. 2012; 287(32):27217–27226. <https://www.sciencedirect.com/science/article/pii/S0021925820479190>, doi: <https://doi.org/10.1074/jbc.M112.377283>.
- 498 **Kwiatkowski S**, Seliga AK, Vertommen D, Terreri M, Ishikawa T, Grabowska I, Tiebe M, Teleman AA, Jagielski AK,  
499 Veiga-Da-Cunha M, Drozak J. SETD3 protein is the actin-specific histidine N-methyltransferase. *eLife*. 2018;  
500 7(2016):1–42. doi: 10.7554/eLife.37921.
- 501 **Lagardère L**, Aviat F, Piquemal JP. Pushing the Limits of Multiple-Time-Step Strategies for Polarizable  
502 Point Dipole Molecular Dynamics. *Journal of Physical Chemistry Letters*. 2019; 10(10):2593–2599. doi:  
503 10.1021/acs.jpcclett.9b00901.
- 504 **Lagardère L**, Lipparini F, Polack É, Stamm B, Cancès É, Schnieders M, Ren P, Maday Y, Piquemal JP. Scalable Eval-  
505 uation of Polarization Energy and Associated Forces in Polarizable Molecular Dynamics: II. Toward Massively  
506 Parallel Computations Using Smooth Particle Mesh Ewald. *Journal of Chemical Theory and Computation*.  
507 2015; 11(6):2589–2599. doi: 10.1021/acs.jctc.5b00171.
- 508 **Lagardère L**, Jolly LH, Lipparini F, Aviat F, Stamm B, Jing ZF, Harger M, Torabifard H, Cisneros GA, Schnieders  
509 MJ, Gresh N, Maday Y, Ren PY, Ponder JW, Piquemal JP. Tinker-HP: a massively parallel molecular dynamics  
510 package for multiscale simulations of large complex systems with advanced point dipole polarizable force  
511 fields. *Chem Sci*. 2018; 9:956–972. <http://dx.doi.org/10.1039/C7SC04531J>, doi: 10.1039/C7SC04531J.
- 512 **Laurent B**, Chavent M, Cragolini T, Dahl ACE, Pasquali S, Derreumaux P, Sansom MSP, Baaden M. Epoch:  
513 Rapid analysis of protein pocket dynamics. *Bioinformatics*. 2015; 31(9):1478–1480. doi: 10.1093/bioinfor-  
514 matics/btu822.
- 515 **Li H**, Ngo V, Silva MCD, Salahub DR, Callahan K, Roux B, Noskov SY. Representation of Ion–Protein Interactions  
516 Using the Drude Polarizable Force-Field. *The Journal of Physical Chemistry B*. 2015; 119(29):9401–9416. doi:  
517 10.1021/jp510560k.
- 518 **Lipparini F**, Lagardère L, Stamm B, Cancès É, Schnieders M, Ren P, Maday Y, Piquemal JP. Scalable Evaluation  
519 of Polarization Energy and Associated Forces in Polarizable Molecular Dynamics: II. Toward Massively Paral-  
520 lel Computations Using Smooth Particle Mesh Ewald. *Journal of Chemical Theory and Computation*. 2014;  
521 10(6):1638–1651. doi: 10.1021/acs.jctc.5b00171.
- 522 **Lynch CI**, Klesse G, Rao S, Tucker SJ, Sansom MSP. Water Nanoconfined in a Hydrophobic Pore: Molecu-  
523 lar Dynamics Simulations of Transmembrane Protein 175 and the Influence of Water Models. *ACS Nano*.  
524 2021; 15(12):19098–19108. <https://doi.org/10.1021/acsnano.1c06443>, doi: 10.1021/acsnano.1c06443, pMID:  
525 34784172.
- 526 **Maier JA**, Martinez C, Kasavajhala K, Wickstrom L, Hauser KE, Simmerling C. ff14SB: Improving the Accuracy  
527 of Protein Side Chain and Backbone Parameters from ff99SB. *Journal of Chemical Theory and Computa-  
528 tion*. 2015; 11(8):3696–3713. <https://doi.org/10.1021/acs.jctc.5b00255>, doi: 10.1021/acs.jctc.5b00255, pMID:  
529 26574453.
- 530 **McCullagh M**, Saunders MG, Voth GA. Unraveling the Mystery of ATP Hydrolysis in Actin Filaments. *Jour-  
531 nal of the American Chemical Society*. 2014; 136(37):13053–13058. <https://doi.org/10.1021/ja507169f>, doi:  
532 10.1021/ja507169f, pMID: 25181471.
- 533 **McGibbon RT**, Beauchamp KA, Harrigan MP, Klein C, Swails JM, Hernández CX, Schwantes CR, Wang LP, Lane TJ,  
534 Pande VS. MDTraj: A Modern Open Library for the Analysis of Molecular Dynamics Trajectories. *Biophysical  
535 Journal*. 2015; 109(8):1528–1532. doi: 10.1016/j.bpj.2015.08.015.
- 536 **Melcr J**, Piquemal JP. Accurate Biomolecular Simulations Account for Electronic Polarization. *Frontiers in Molec-  
537 ular Biosciences*. 2019 Dec; 6. <https://doi.org/10.3389/fmolb.2019.00143>, doi: 10.3389/fmolb.2019.00143.
- 538 **Melo MCR**, Bernardi RC, De La Fuente-Nunez C, Luthey-Schulten Z. Generalized correlation-based dynamical  
539 network analysis: A new high-performance approach for identifying allosteric communications in molecular  
540 dynamics trajectories. *Journal of Chemical Physics*. 2020; 153(13). <https://doi.org/10.1063/5.0018980>, doi:  
541 10.1063/5.0018980.

- 542 **Merino F**, Pospich S, Raunser S. Towards a structural understanding of the remodeling of the actin cytoskeleton.  
543 *Seminars in Cell & Developmental Biology*. 2020; 102:51–64. <https://www.sciencedirect.com/science/article/pii/S1084952119301909>, doi: <https://doi.org/10.1016/j.semcdb.2019.11.018>, sl: *Actin*<sub>1</sub>5 June 2019.
- 545 **Miao Y**, Feher VA, McCammon JA. Gaussian Accelerated Molecular Dynamics: Unconstrained Enhanced Sampling and Free Energy Calculation. *Journal of Chemical Theory and Computation*. 2015; 11(8):3584–3595.  
546 <https://doi.org/10.1021/acs.jctc.5b00436>, doi: [10.1021/acs.jctc.5b00436](https://doi.org/10.1021/acs.jctc.5b00436), PMID: 26300708.
- 548 **Nyman T**, Schüler H, Korenbaum E, Schutt CE, Karlsson R, Lindberg U. The role of MeH73 in actin polymerization  
549 and ATP hydrolysis. *Journal of Molecular Biology*. 2002; 317(4):577–589. <https://www.sciencedirect.com/science/article/pii/S0022283602954367>, doi: <https://doi.org/10.1006/jmbi.2002.5436>.
- 551 **Oda T**, Iwasa M, Aihara T, Maéda Y, Narita A. The nature of the globular- to fibrous-actin transition. *Nature*.  
552 2009 Jan; 457(7228):441–445. <https://doi.org/10.1038/nature07685>, doi: [10.1038/nature07685](https://doi.org/10.1038/nature07685).
- 553 **Olsson MHM**, SØndergaard CR, Rostkowski M, Jensen JH. PROPKA3: Consistent treatment of internal and  
554 surface residues in empirical p K a predictions. *Journal of Chemical Theory and Computation*. 2011; 7(2):525–  
555 537. doi: [10.1021/ct100578z](https://doi.org/10.1021/ct100578z).
- 556 **Otterbein LR**, Graceffa P, Dominguez R. The crystal structure of uncomplexed actin in the ADP state. *Science*.  
557 2001; 293(5530):708–711. doi: [10.1126/science.1059700](https://doi.org/10.1126/science.1059700).
- 558 **Pedregosa F**, Varoquaux G, Gramfort A, Michel V, Thirion B, Grisel O, Blondel M, Prettenhofer P, Weiss R,  
559 Dubourg V, Vanderplas J, Passos A, Cournapeau D, Brucher M, Perrot M, Duchesnay E. Scikit-learn: Machine  
560 Learning in Python. *JMLR*. 2011; 12(82):2825–2830.
- 561 **Perrin BJ**, Ervasti JM. The actin gene family: Function follows isoform. *Cytoskeleton*. 2010; 67(10):630–634. doi:  
562 [10.1002/cm.20475](https://doi.org/10.1002/cm.20475).
- 563 **Rackers JA**, Wang Z, Lu C, Laury ML, Lagardère L, Schnieders MJ, Piquemal JP, Ren P, Ponder JW. Tinker 8:  
564 Software Tools for Molecular Design. *Journal of Chemical Theory and Computation*. 2018; 14(10):5273–5289.  
565 doi: [10.1021/acs.jctc.8b00529](https://doi.org/10.1021/acs.jctc.8b00529).
- 566 **Rennebaum S**, Cafilisch A. Inhibition of interdomain motion in g-actin by the natural product latrunculin: A  
567 molecular dynamics study. *Proteins: Structure, Function, and Bioinformatics*. 2012; 80(8):1998–2008. <https://onlinelibrary.wiley.com/doi/abs/10.1002/prot.24088>, doi: <https://doi.org/10.1002/prot.24088>.
- 569 **Reynolds MJ**, Hachicho C, Carl AG, Gong R, Alushin GM. Bending forces and nucleotide state jointly regulate  
570 F-actin structure. *Nature*. 2022; 611:380–386. doi: [10.1038/s41586-022-05366-w](https://doi.org/10.1038/s41586-022-05366-w).
- 571 **Šali A**, Blundell TL, *Comparative Protein Modelling by Satisfaction of Spatial Restraints*; 1993.
- 572 **Saunders MG**, Tempkin J, Weare J, Dinner AR, Roux B, Voth GA. Nucleotide regulation of the structure and  
573 dynamics of G-actin. *Biophysical Journal*. 2014; 106(8):1710–1720. doi: [10.1016/j.bpj.2014.03.012](https://doi.org/10.1016/j.bpj.2014.03.012).
- 574 **Saunders MG**, Voth GA. Water molecules in the nucleotide binding cleft of actin: Effects on subunit con-  
575 formation and implications for ATP hydrolysis. *Journal of Molecular Biology*. 2011; 413(1):279–291. <http://dx.doi.org/10.1016/j.jmb.2011.07.068>, doi: [10.1016/j.jmb.2011.07.068](https://doi.org/10.1016/j.jmb.2011.07.068).
- 577 **Schroer CFE**, Baldauf L, van Buren L, Wassenaar TA, Melo MN, Koenderink GH, Marrink SJ. Charge-  
578 dependent interactions of monomeric and filamentous actin with lipid bilayers. *Proceedings of the National*  
579 *Academy of Sciences*. 2020; 117(11):5861–5872. <https://www.pnas.org/doi/abs/10.1073/pnas.1914884117>, doi:  
580 [10.1073/pnas.1914884117](https://doi.org/10.1073/pnas.1914884117).
- 581 **Shamloo A**, Mehrafrooz B. Nanomechanics of actin filament: A molecular dynamics simulation. *Cy-*  
582 *toskeleton*. 2018; 75(3):118–130. <https://onlinelibrary.wiley.com/doi/abs/10.1002/cm.21429>, doi:  
583 <https://doi.org/10.1002/cm.21429>.
- 584 **Shi Y**, Ren P, Schnieders M, Piquemal JP. 2. In: *Polarizable Force Fields for Biomolecular Modeling* John Wi-  
585 *ley & Sons, Ltd*; 2015. p. 51–86. <https://onlinelibrary.wiley.com/doi/abs/10.1002/9781118889886.ch2>, doi:  
586 <https://doi.org/10.1002/9781118889886.ch2>.
- 587 **Shi Y**, Xia Z, Zhang J, Best R, Wu C, Ponder JW, Ren P. Polarizable atomic multipole-based AMOEBA force field  
588 for proteins. *Journal of Chemical Theory and Computation*. 2013; 9(9):4046–4063. doi: [10.1021/ct4003702](https://doi.org/10.1021/ct4003702).

- 589 **Song C**, Weichbrodt C, Salnikov ES, Dynowski M, Forsberg BO, Bechinger B, Steinem C, de Groot BL, Zachariae  
590 U, Zeth K. Crystal structure and functional mechanism of a human antimicrobial membrane channel. Pro-  
591 ceedings of the National Academy of Sciences. 2013; 110(12):4586–4591. [https://www.pnas.org/doi/abs/10.](https://www.pnas.org/doi/abs/10.1073/pnas.1214739110)  
592 [1073/pnas.1214739110](https://www.pnas.org/doi/abs/10.1073/pnas.1214739110), doi: [10.1073/pnas.1214739110](https://doi.org/10.1073/pnas.1214739110).
- 593 **Souza PCT**, Alessandri R, Barnoud J, Thallmair S, Faustino I, Grünwald F, Patmanidis I, Abdizadeh H, Bruininks  
594 BMH, Wassenaar TA, Kroon PC, Melcr J, Nieto V, Corradi V, Khan HM, Domański J, Javanainen M, Martinez-  
595 Seara H, Reuter N, Best RB, et al. Martini 3: a general purpose force field for coarse-grained molecular  
596 dynamics. *Nature Methods*. 2021 Apr; 18(4):382–388. <https://doi.org/10.1038/s41592-021-01098-3>, doi:  
597 [10.1038/s41592-021-01098-3](https://doi.org/10.1038/s41592-021-01098-3).
- 598 **Splettstoesser T**, Holmes KC, Noé F, Smith JC. Structural modeling and molecular dynamics simulation of the  
599 actin filament. *Proteins: Structure, Function, and Bioinformatics*. 2011; 79(7):2033–2043. [https://onlinelibrary.](https://onlinelibrary.wiley.com/doi/abs/10.1002/prot.23017)  
600 [wiley.com/doi/abs/10.1002/prot.23017](https://onlinelibrary.wiley.com/doi/abs/10.1002/prot.23017), doi: <https://doi.org/10.1002/prot.23017>.
- 601 **Splettstoesser T**, Noé F, Oda T, Smith JC. Nucleotide-dependence of G-actin conformation from multiple molec-  
602 ular dynamics simulations and observation of a putatively polymerization-competent superclosed state. *Pro-*  
603 *teins: Structure, Function, and Bioinformatics*. 2009; 76(2):353–364. [https://onlinelibrary.wiley.com/doi/abs/](https://onlinelibrary.wiley.com/doi/abs/10.1002/prot.22350)  
604 [10.1002/prot.22350](https://onlinelibrary.wiley.com/doi/abs/10.1002/prot.22350), doi: <https://doi.org/10.1002/prot.22350>.
- 605 **Stone AJ**. Distributed multipole analysis, or how to describe a molecular charge distribution. *Chemical Physics*  
606 *Letters*. 1981; 83(2):233–239. doi: [10.1016/0009-2614\(81\)85452-8](https://doi.org/10.1016/0009-2614(81)85452-8).
- 607 **Svitkina T**. The Actin Cytoskeleton and Actin-Based Motility. *Cold Spring Harbor Perspectives in Biology*. 2018;  
608 10(1):a018267. doi: [10.1101/cshperspect.a018267](https://doi.org/10.1101/cshperspect.a018267).
- 609 **Vanommeslaeghe K**, Hatcher E, Acharya C, Kundu S, Zhong S, Shim J, Darian E, Guvench O, Lopes P, Vorobyov  
610 I, Mackerell Jr AD. CHARMM general force field: A force field for drug-like molecules compatible with the  
611 CHARMM all-atom additive biological force fields. *Journal of Computational Chemistry*. 2010; 31(4):671–690.  
612 <https://onlinelibrary.wiley.com/doi/abs/10.1002/jcc.21367>, doi: <https://doi.org/10.1002/jcc.21367>.
- 613 **Varland S**, Vandekerckhove J, Drazic A. Actin Post-translational Modifications: The Cinderella of Cytoskeletal  
614 Control. *Trends in Biochemical Sciences*. 2019; 44(6):502–516. <https://doi.org/10.1016/j.tibs.2018.11.010>, doi:  
615 [10.1016/j.tibs.2018.11.010](https://doi.org/10.1016/j.tibs.2018.11.010).
- 616 **Virtanen P**, Gommers R, Oliphant TE, Haberland M, Reddy T, Cournapeau D, Burovski E, Peterson P, Weckesser  
617 W, Bright J, van der Walt SJ, Brett M, Wilson J, Millman KJ, Mayorov N, Nelson ARJ, Jones E, Kern R, Larson E,  
618 Carey CJ, et al. SciPy 1.0: fundamental algorithms for scientific computing in Python. *Nature Methods*. 2020;  
619 17(3):261–272. doi: [10.1038/s41592-019-0686-2](https://doi.org/10.1038/s41592-019-0686-2).
- 620 **Walker B**, Jing Z, Ren P. Molecular dynamics free energy simulations of ATP:Mg<sup>2+</sup> and ADP:Mg<sup>2+</sup> using the  
621 polarisable force field AMOEBA. *Molecular Simulation*. 2020; 0(0):1–10. [https://doi.org/10.1080/08927022.](https://doi.org/10.1080/08927022.2020.1725003)  
622 [2020.1725003](https://doi.org/10.1080/08927022.2020.1725003), doi: [10.1080/08927022.2020.1725003](https://doi.org/10.1080/08927022.2020.1725003).
- 623 **Wegner A**. Treadmilling of actin at physiological salt concentrations: An analysis of the critical concentrations  
624 of actin filaments. *Journal of Molecular Biology*. 1982; 161(4):607–615. [https://www.sciencedirect.com/science/](https://www.sciencedirect.com/science/article/pii/0022283682904119)  
625 [article/pii/0022283682904119](https://www.sciencedirect.com/science/article/pii/0022283682904119), doi: [https://doi.org/10.1016/0022-2836\(82\)90411-9](https://doi.org/10.1016/0022-2836(82)90411-9).
- 626 **Westerlund AM**, Fleetwood O, Pérez-Conesa S, Delemotte L. Network analysis reveals how lipids and other  
627 cofactors influence membrane protein allostery. *J Chem Phys*. 2020 Oct; 153(14):141103.
- 628 **Wilkinson AW**, Diep J, Dai S, Liu S, Ooi YS, Song D, Li TM, Horton JR, Zhang X, Liu C, Trivedi DV, Ruppel KM,  
629 Vilches-Moure JG, Casey KM, Mak J, Cowan T, Elias JE, Nagamine CM, Spudich JA, Cheng X, et al. SETD3 is an  
630 actin histidine methyltransferase that prevents primary dystocia. *Nature*. 2019; 565(7739):372–376. [http:](https://dx.doi.org/10.1038/s41586-018-0821-8)  
631 [/dx.doi.org/10.1038/s41586-018-0821-8](https://dx.doi.org/10.1038/s41586-018-0821-8), doi: [10.1038/s41586-018-0821-8](https://doi.org/10.1038/s41586-018-0821-8).
- 632 **Zsolnay V**, Katkar HH, Chou SZ, Pollard TD, Voth GA. Structural basis for polarized elongation of actin filaments.  
633 *Proceedings of the National Academy of Sciences of the United States of America*. 2020; 117(48):30458–  
634 30464. doi: [10.1073/pnas.2011128117](https://doi.org/10.1073/pnas.2011128117).

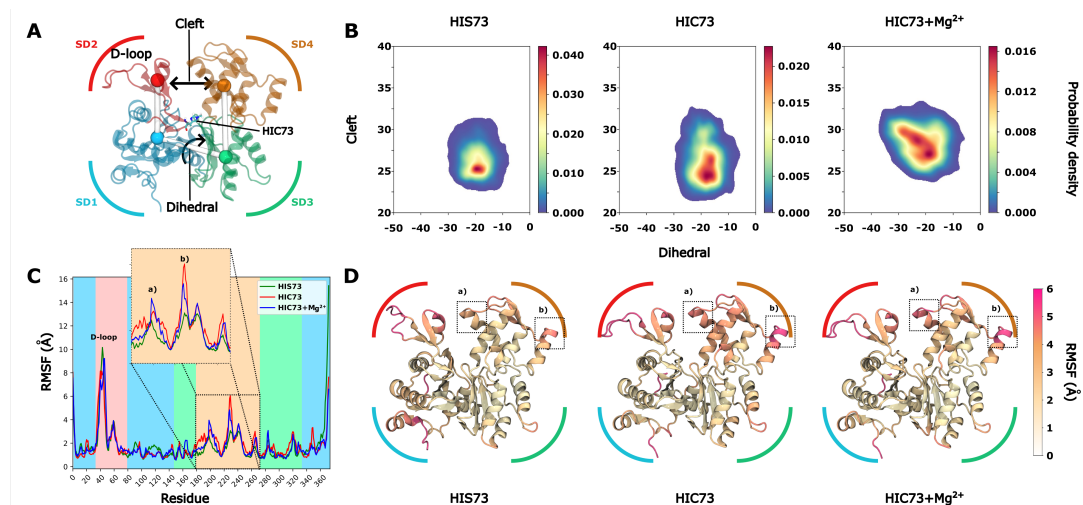

**Figure 1. ATP-bound  $\beta$ -actin fluctuations.** **A**- Subdomains localisation. Definition of the cleft as the distance between SD2 and SD4 and the dihedral angle formed by SD2-SD1-SD3-SD4 subdomains. **B**- Distribution of cleft-dihedrals for actin without methylation (HIS73), or with methylation (HIC73) in presence of KCl and  $MgCl_2$  (HIC73+Mg). **C**- RMSF of each system. Zoom on the SD4 subdomain, with a focus on a) [200-206] and b) [228-232] helices **D**- Representation of each system colored according to their RMSF.

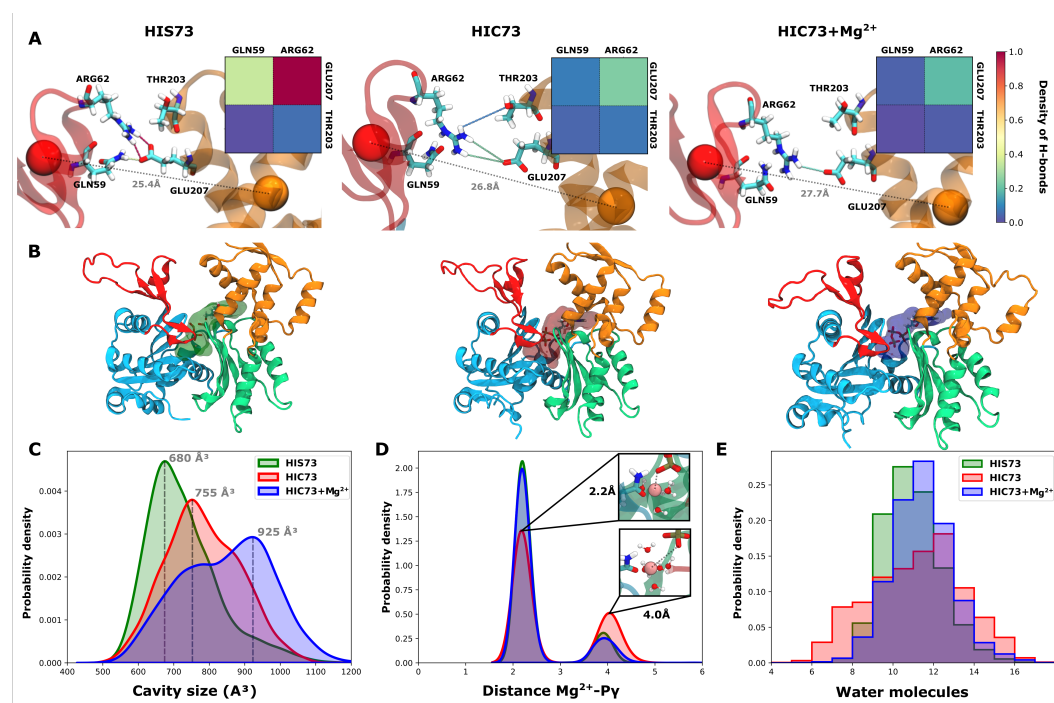

**Figure 2. Local variations of ATP-bound  $\beta$ -actin systems** **A**- Representation of main links involving SD2 and SD4 residues. Links are colored with respect to the normalized density of Hbonds between these residues along simulations. **B**- Representation of nucleotide cavity located in main basin of fig 1. **C**- Cavity size of each system **D**- Distance between magnesium ion and  $\gamma$ -phosphate. **E**- Number of water molecules located at 5Å or less of the magnesium ion.

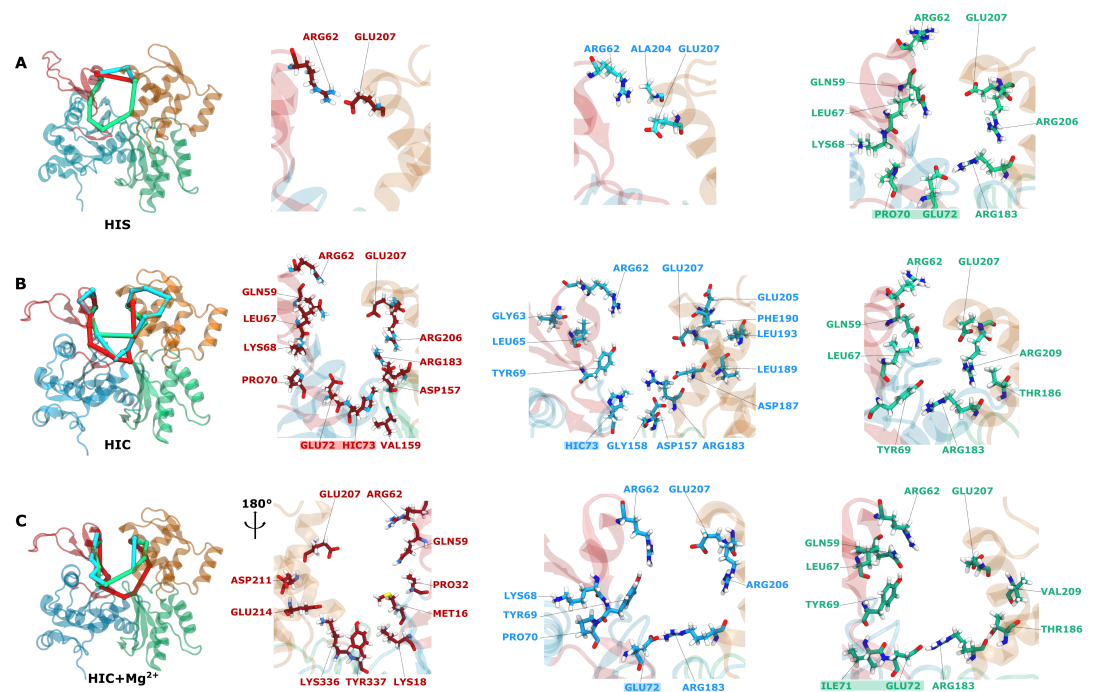

**Figure 3. Correlations pathways in ATP-bound  $\beta$ -actin systems.** Representation of 3 most represented pathways of communication between ARG62 and GLU207 for **A-** HIS73, **B-**HIC73 and **C-** HIC73+MG systems. Concerned amino acids are represented in licorice



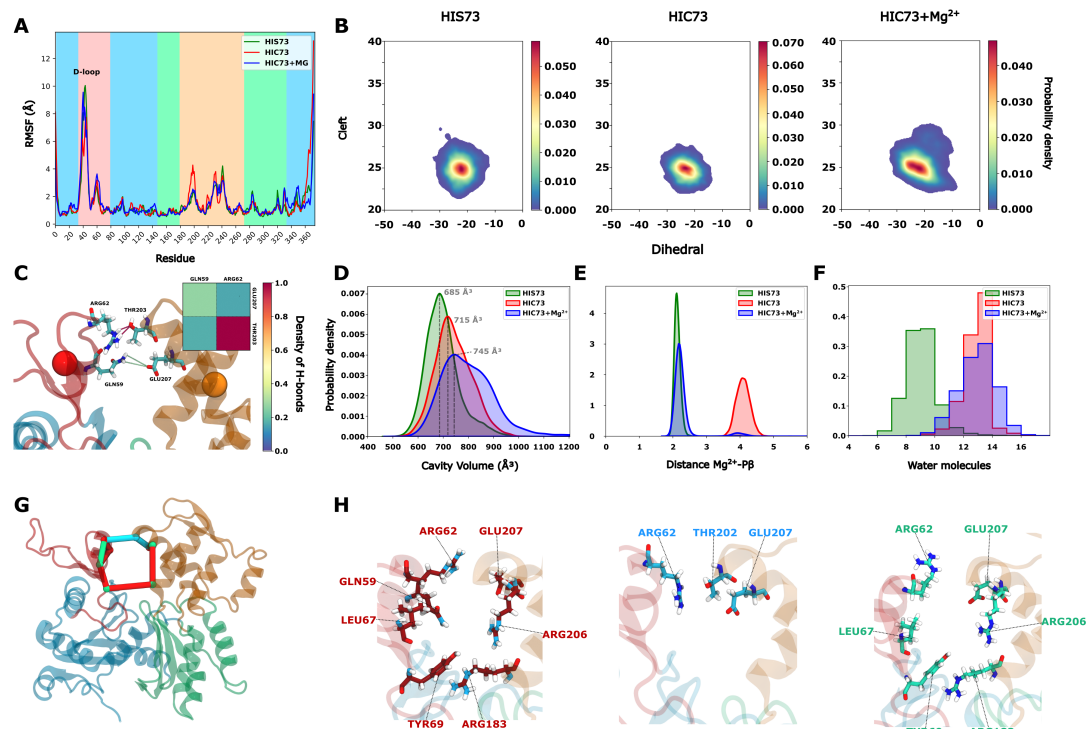

**Figure 4. Replacement of ATP for ADP cancels the  $\beta$ -actin dynamics.** **A-** RMSF of ADP-Actin systems. **B-** Cleft-Dihedral maps of ADP-Actin systems. **C-** Main H-bonds between SD2-SD4 subdomains in ATP-HIC system. **D-** Cavity volume of ADP-Actin systems. **E-** Distance between  $\beta$  phosphate of ADP and magnesium ion inside the cavity. **F-** Number of water molecules located at less than 5Å from the magnesium ion of the cavity. **G-** Representation of three most represented shortest paths between ARG62 and GLU207 in ADP-HIC system and **H-** Licorice representation of involved amino acids. Pathways of HIS and HIC+Mg systems are available in Fig S4

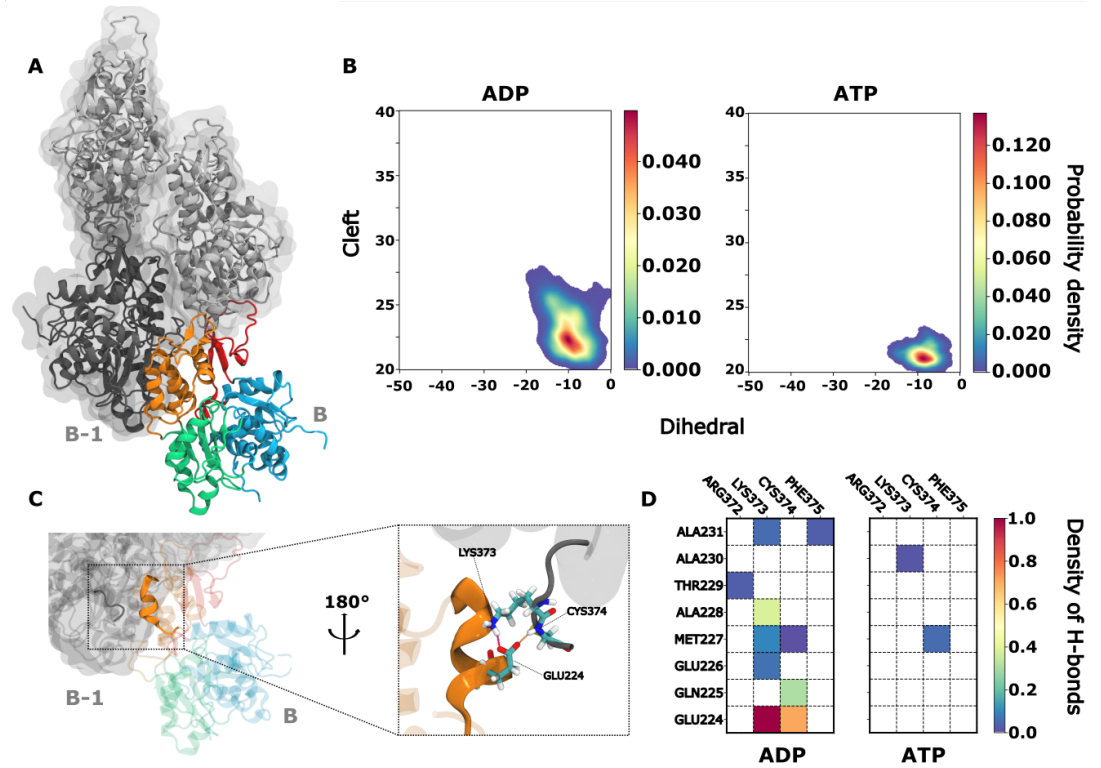

**Figure 5. Nucleotide dependent fluctuations of the barbed end.** **Upper panel:** Representation of subunit B (colored) and B-1 (Dark Grey). Distribution of Cleft-Dihedrals angles for B subunits in ADP and ATP states. **Lower Panel:** Highlight of C-terminal extremity of B-1 subunit and 220-230 helix of subunit B. Representation of the highest hydrogen bonds between C-terminal extremity of B-1 subunit and 220-230 helix of subunit B. Density of hydrogen bonds between C-terminal extremity of B-1 subunit and 220-230 helix of subunit B in ADP and ATP state
